# Supplementary material
Source: Springer Nature journal article supplement (https://www.springermedizin.de/resource/supplementary/12885_2010_2757_MOESM6_ESM.pdf/9461814)

### A. WGCNA\* mortality groups

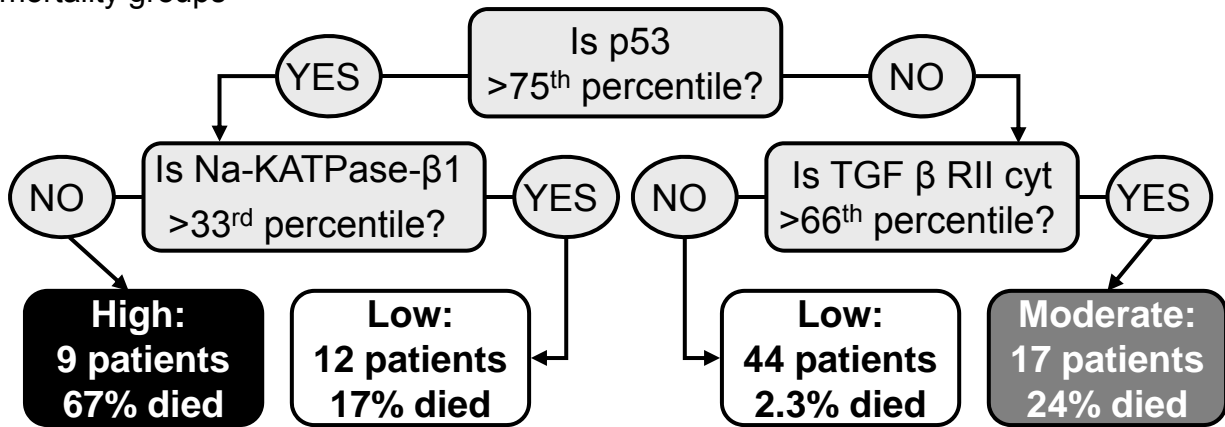

### B. COX model mortality groups

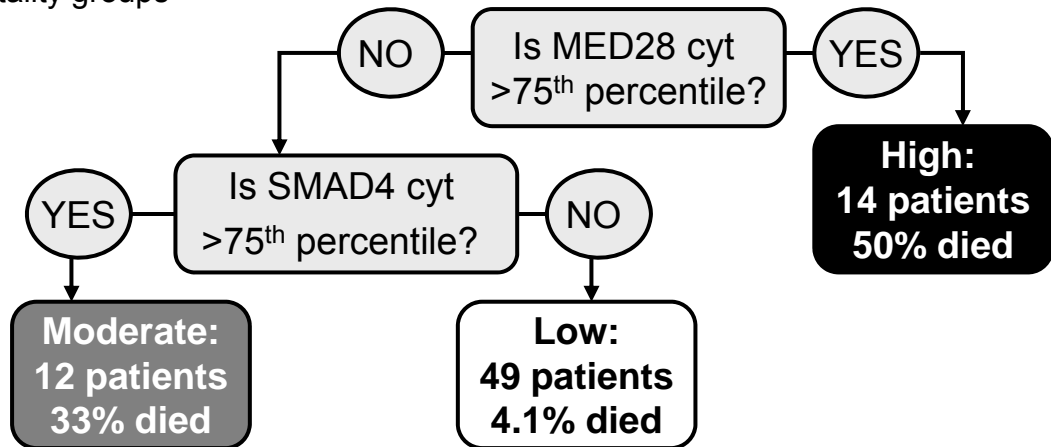

Supplement: MOESM6 [file 9461814]
